# Supplementary material for: Comorbidities and healthcare costs and resource use of patients with nonalcoholic fatty liver disease (NAFLD) and nonalcoholic steatohepatitis (NASH) in the Japan medical data vision database
Source: PubMed Central journal article supplement (PMC7932941; doi:10.1007/s00535-021-01759-2), 2021-01-26
Supplement: 535_2021_1759_MOESM3_ESM.pdf [file 535_2021_1759_MOESM3_ESM.pdf]

## **SUPPLEMENTARY MATERIALS**

### **Comorbidities and Healthcare Costs and Resource Use of Patients with Nonalcoholic Fatty Liver Disease (NAFLD) and Nonalcoholic Steatohepatitis (NASH) in the Japan Medical Data Vision Database**

Shuji Terai<sup>1</sup>, Amy Buchanan-Hughes<sup>2</sup>, Alvin Ng<sup>3</sup>, I-Heng Lee<sup>4</sup>, Ken Hasegawa<sup>4</sup>

<sup>1</sup>Division of Gastroenterology and Hepatology, Graduate School of Medical and Dental Sciences, Niigata University, Niigata, Japan;

<sup>2</sup>Costello Medical, Boston, MA, USA;

<sup>3</sup>Costello Medical, Singapore, Singapore;

<sup>4</sup>Gilead Sciences Inc, Foster City, CA, USA

**Correspondence to:** Ken Hasegawa ([ken.hasegawa1@gilead.com](mailto:ken.hasegawa1@gilead.com))

**Journal:** Journal of Gastroenterology

**Supplementary Table 1 Demographic characteristics of overall population, and stratified by year of index date.** Patients who had their index dates in each particular year were included in that year's analysis

| Variable         |        | At index date  |                      | 2011 and pre-2011 | 2012          | 2013          | 2014          | 2015          | 2016          | 2017          | P Value <sup>b</sup> |
|------------------|--------|----------------|----------------------|-------------------|---------------|---------------|---------------|---------------|---------------|---------------|----------------------|
|                  |        | (N = 58,958)   |                      | (N = 11,515)      | (N = 3,310)   | (N = 4,629)   | (N = 7,046)   | (N = 10,037)  | (N = 11,535)  | (N = 10,886)  |                      |
|                  |        | n (%)          | P value <sup>a</sup> | n (%)             | n (%)         | n (%)         | n (%)         | n (%)         | n (%)         | n (%)         |                      |
| Gender           | Male   | 32,698 (55.46) | <0.001               | 6,429 (55.83)     | 1,904 (57.52) | 2,575 (55.63) | 3,952 (56.09) | 5,578 (55.57) | 6,325 (54.83) | 5,935 (54.52) | 0.038                |
|                  | Female | 26,260 (44.54) |                      | 5,086 (44.17)     | 1,406 (42.48) | 2,054 (44.37) | 3,094 (43.91) | 4,459 (44.43) | 5,210 (45.17) | 4,951 (45.48) |                      |
| Age group, years | 18–34  | 2,409 (4.09)   | N/A                  | 264 (2.29)        | 142 (4.29)    | 205 (4.43)    | 336 (4.77)    | 463 (4.61)    | 508 (4.40)    | 491 (4.51)    | N/A                  |
|                  | 35–44  | 5,293 (8.98)   |                      | 823 (7.15)        | 330 (9.97)    | 502 (10.84)   | 680 (9.65)    | 956 (9.52)    | 1,070 (9.28)  | 932 (8.56)    |                      |
|                  | 45–54  | 8,897 (15.09)  |                      | 1,529 (13.28)     | 498 (15.05)   | 675 (14.58)   | 1,052 (14.93) | 1,599 (15.93) | 1,837 (15.93) | 1,707 (15.68) |                      |
|                  | 55–64  | 14,334 (24.31) |                      | 3,210 (27.88)     | 904 (27.31)   | 1,181 (25.51) | 1,758 (24.95) | 2,351 (23.42) | 2,534 (21.97) | 2,396 (22.01) |                      |
|                  | 65–74  | 17,434 (29.57) |                      | 3,410 (29.61)     | 894 (27.01)   | 1,318 (28.47) | 2,054 (29.15) | 2,953 (29.42) | 3,521 (30.52) | 3,284 (30.17) |                      |
|                  | 75+    | 10,591 (17.96) |                      | 2,279 (19.79)     | 542 (16.37)   | 748 (16.16)   | 1,166 (16.55) | 1,715 (17.09) | 2,065 (17.90) | 2,076 (19.07) |                      |
| Age, years       | Mean   | 61.63          |                      | 63.29             | 60.76         | 60.75         | 60.91         | 61.01         | 61.41         | 61.77         | <0.001               |
|                  | SD     | 13.99          |                      | 12.93             | 13.86         | 14.09         | 14.23         | 14.23         | 14.21         | 14.30         |                      |
|                  | Median | 64.00          |                      | 64.00             | 63.00         | 63.00         | 63.00         | 63.00         | 64.00         | 64.00         |                      |

<sup>a</sup>One-way chi-squared test with expected frequencies of gender as reported in 2015 Japanese Census. <sup>b</sup>Pearson's chi-squared tests of association between gender and year of enrolment from 2012 to 2017; comparisons of mean age across years from 2012 to 2017 with ANOVA. *SD* standard deviation

**Supplementary Table 2 Demographic characteristics of patients in the NASH subgroup.** NASH subgroup includes patients (with or without NAFLD) with at least one claim for NASH at any time during the study; in the NASH subgroup, the index date was the date of the first claim for either NASH or NAFLD

| Variable   |              | NASH          |
|------------|--------------|---------------|
|            |              | (N = 1,139)   |
|            |              | n (%)         |
| Gender     | Male         | 574 (50.4)    |
|            | Female       | 565 (49.6)    |
| Age group  | 18-34 years  | 73 (6.4)      |
|            | 35-44 years  | 125 (11.0)    |
|            | 45-54 years  | 209 (18.4)    |
|            | 55-64 years  | 229 (20.1)    |
|            | 65-74 years  | 286 (25.1)    |
|            | 75+ years    | 217 (19.1)    |
| Age, years | Mean (SD)    | 59.87 (15.56) |
|            | Median (IQR) | 62.00 (23.00) |

*IQR* interquartile range, *NAFLD* nonalcoholic fatty liver disease, *NASH* nonalcoholic steatohepatitis, *SD* standard deviation

**Supplementary Table 3 BMI categories for patients with available height and weight data.** Height and weight data were only available for patients who had been hospitalized. BMI categories were determined based on Asia-Pacific obesity classification criteria

| BMI category                                   | All           | Ages 18 to 34 | Ages 35 to 44 | Ages 45 to 54 | Ages 55 to 64 | Ages 65 to 74 | Ages 75 and above |
|------------------------------------------------|---------------|---------------|---------------|---------------|---------------|---------------|-------------------|
|                                                | (N = 9,620)   | (N = 368)     | (N = 730)     | (N = 1,169)   | (N = 1,972)   | (N = 2,970)   | (N = 2,411)       |
|                                                | n (%)         | n (%)         | n (%)         | n (%)         | n (%)         | n (%)         | n (%)             |
| <b>Underweight (BMI&lt;18.5)</b>               | 315 (3.27)    | 7 (1.90)      | 13 (1.78)     | 29 (2.48)     | 33 (1.67)     | 84 (2.83)     | 149 (6.18)        |
| <b>Normal weight (18.5≤BMI&lt;23.0)</b>        | 2,131 (22.15) | 51 (13.86)    | 86 (11.78)    | 160 (13.69)   | 400 (20.28)   | 724 (24.38)   | 710 (29.45)       |
| <b>Overweight/"at risk" (23.0≤BMI&lt;25.0)</b> | 1,864 (19.38) | 34 (9.24)     | 63 (8.63)     | 171 (14.63)   | 386 (19.57)   | 658 (22.15)   | 552 (22.90)       |
| <b>Obese I (25.0≤BMI&lt;30.0)</b>              | 3,658 (38.02) | 105 (28.53)   | 288 (39.45)   | 477 (40.80)   | 821 (41.63)   | 1,155 (38.89) | 812 (33.68)       |
| <b>Obese II (BMI≥30)</b>                       | 1,652 (17.17) | 171 (46.47)   | 280 (38.36)   | 332 (28.40)   | 332 (16.84)   | 349 (11.75)   | 188 (7.80)        |

*BMI* body mass index.

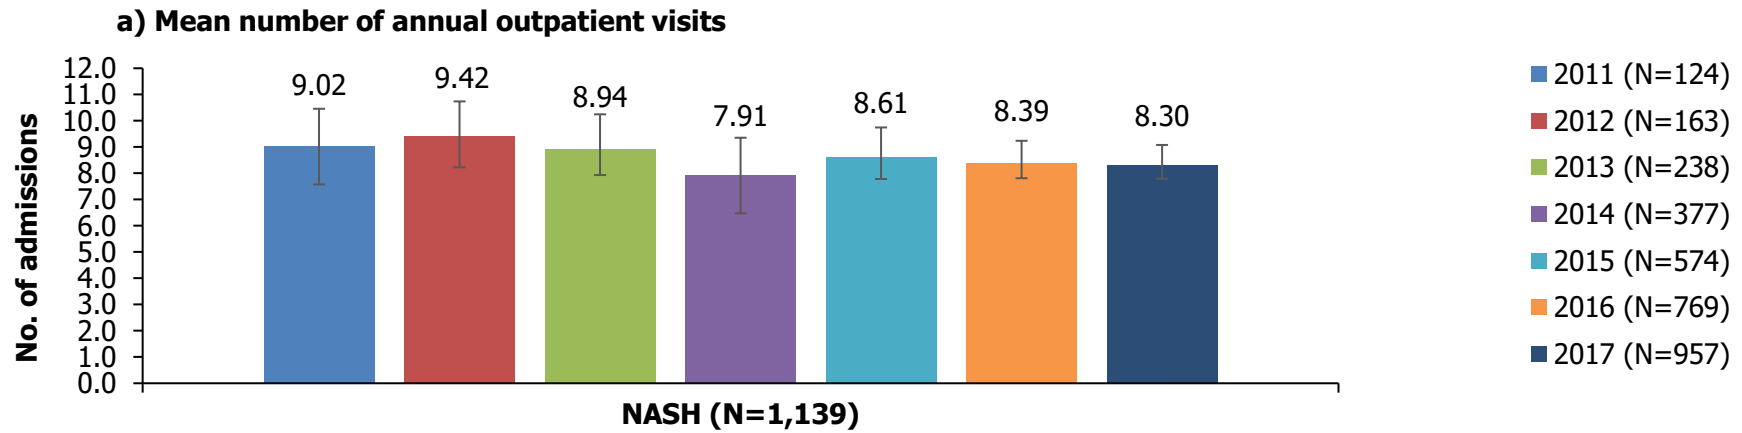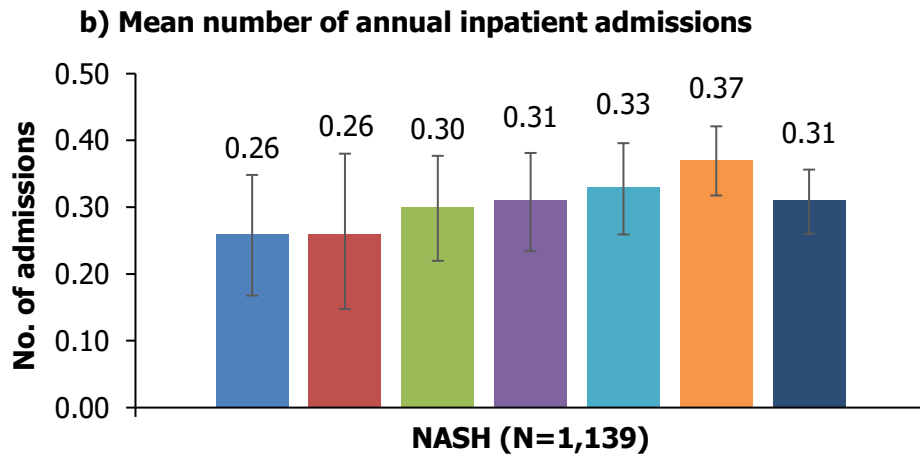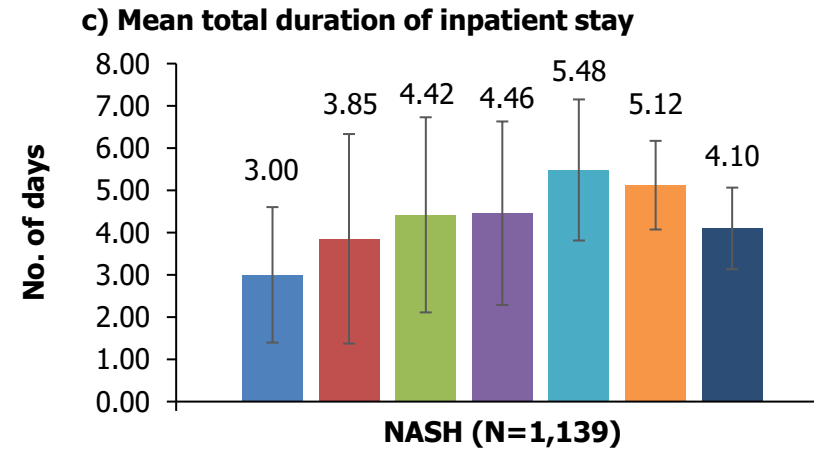

**Supplementary Fig. 1 Inpatient resource use for patients in the NASH subgroup.** NASH subgroup includes patients (with or without NAFLD) with at least one claim for NASH at any time during the study. Total duration of inpatient stay is total days per year, not length of stay per admission. Error bars represent 95% confidence intervals. *NASH* nonalcoholic steatohepatitis

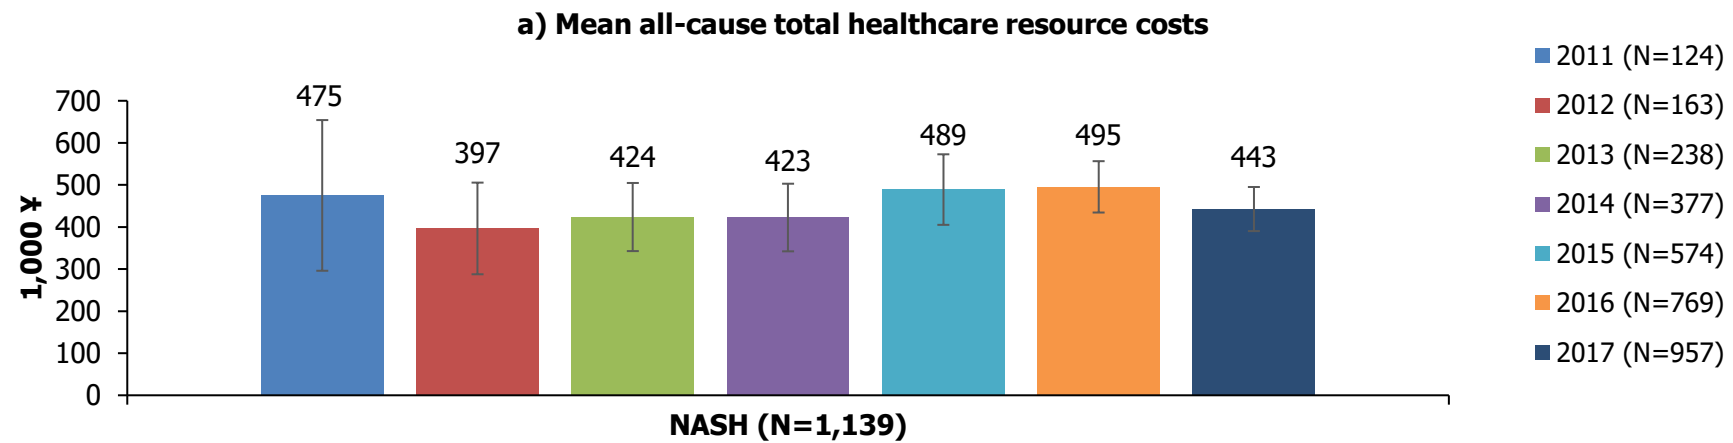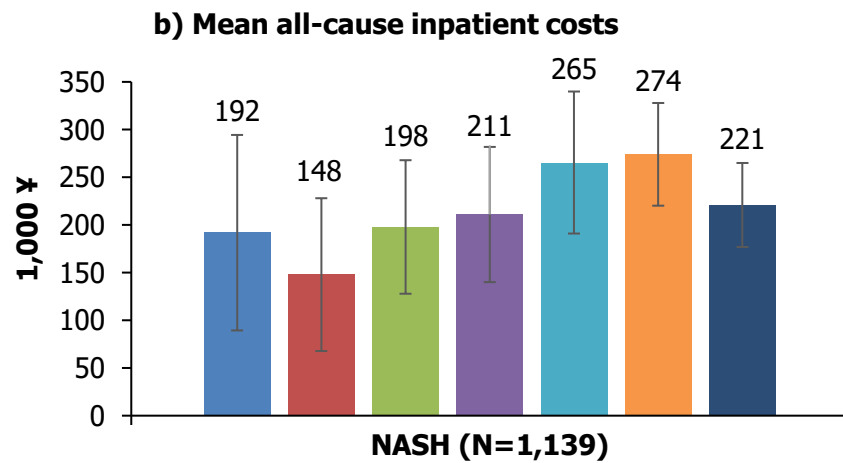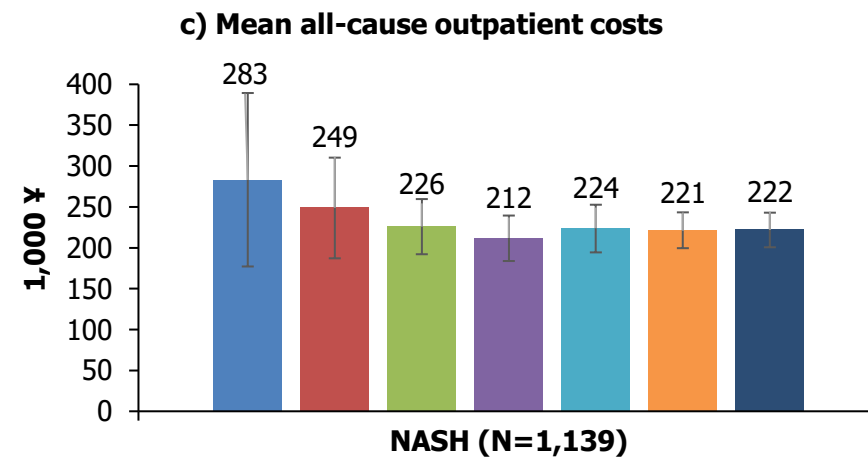

**Supplementary Fig. 2 All-cause healthcare resource costs for patients in the NASH subgroup.** NASH subgroup includes patients (with or without NAFLD) with at least one claim for NASH at any time during the study. Error bars represent 95% confidence intervals. *NASH* nonalcoholic steatohepatitis
